# Supplementary material for: Solvent-free mechanochemical synthesis of phosphonium saltsElectronic supplementary information (ESI) available: X-ray diffraction patterns of 1. See http://www.rsc.org/suppdata/cc/b1/b111515d/
Source: Royal Society of Chemistry journal article supplement (doi:10.1039/b111515d), 2002-03-06
Supplement: b111515d.pdf [file b111515d.pdf]

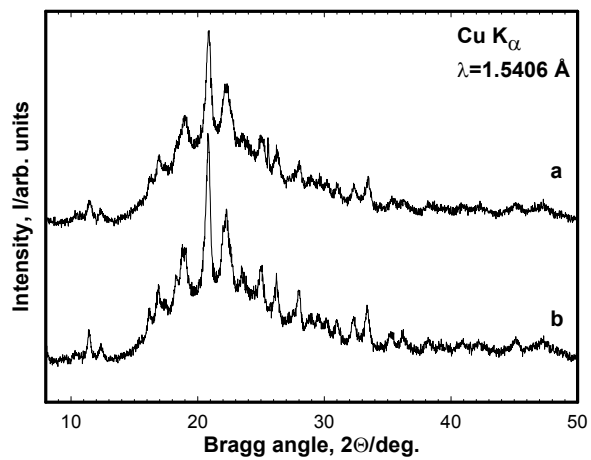

**Fig. 2.** The x-ray powder diffraction patterns of phenacyltriphenylphosphonium bromide **1** prepared mechanochemically by ball-milling of triphenylphosphine and 2-bromoacetophenone for one hour without solvent (a), and commercial bromide **1** (Lancaster Synthesis) ball-milled for one hour (b).
